# Supplementary material for: Chemically functionalized germanene for spintronic devices: a first-principles study
Source: Royal Society of Chemistry journal article supplement (doi:10.1039/c5cp08055j), 2016-01-01
Supplement: c5cp08055j1.pdf [file c5cp08055j1.pdf]

# Chemically Functionalized Germanene for Spintronic Devices: A First Principles Study<sup>†</sup>

Jun Zhao,<sup>a,c</sup> Hui Zeng,<sup>b,c‡</sup>

Received Xth XXXXXXXXXXXX 20XX, Accepted Xth XXXXXXXXXXXX 20XX

First published on the web Xth XXXXXXXXXXXX 200X

DOI: 10.1039/b000000x

## 1 Stability of Functionalized Germanene

To examine the stability of the various functionalized germanene, we make use of the formation energies defined as  $E_f = E(\text{con}) - E(\text{ger}) - \sum_i x_i \mu_i$ , where  $E(\text{con})$  and  $E(\text{ger})$  are the total energies of functionalized confirmations and free-standing germanene monolayer, respectively. The  $x_i$  ( $i = \text{H, O, F}$ ) is the molar fraction of the corresponding atoms in the attached ligand, and  $\mu_i$  is the chemical potential of the constituents at a given state. We choose  $\mu_i$  as the 1/2 total energies of the corresponding diatomic molecules ( $\text{H}_2$ ,  $\text{O}_2$ ,  $\text{F}_2$ )<sup>1</sup>. The calculated  $\sum_i x_i \mu_i$  is the chemical potential of the attached ligand\*. The formation energies of differently functionalized germanene is summarized in Table S1. The formation energy defined above therefore can be regarded as a measure of the stability against molecular desorption from the germanene surface. As a result, the functionalized germanene nanostructures with more negative formation energies are more stable. The two-sided functionalizations are found to be systematically more stable than the one-sided functionalizations. This phenomenon is attributed to the higher symmetry of the fully functionalized nanostructures compared with the semi-functionalized counterparts, and the Ge atoms more approach to the  $sp^3$  hybridization in the former case. The relative stability of the fully functionalized germanenes follows the sequence of F-germanene-F > F-germanene-H > O-germanene-H. For the semi-functionalized germanenes,

**Table 1** Formation energies per atom of optimized 2D Ge-based nanomaterials. The energies are given in eV per atom

| Conformation             | $E_f$ |
|--------------------------|-------|
| F-germanene-F            | -1.60 |
| F-germanene-H            | -0.87 |
| O-germanene-H            | -0.07 |
| germanene- $\text{CH}_3$ | -0.32 |
| germanene-F              | -0.85 |
| germanene-OH             | -0.33 |

the formation energies of the -OH functionalization and - $\text{CH}_3$  are rather similar. More specifically, the functionalized nanostructures are stabilized by fluorination in both fully- and semi-functionalized cases, which is due to the large difference in the dissociation energy between hydrogen (also oxygen) and fluorine molecules. Consequently, the relative stability of the semi-functionalized germanenes decreases in this order: germanene-F > germanene-OH > germanene- $\text{CH}_3$ . It is noted that all the examined functionalized germanenes are exothermic evaluated in terms of their formation energies. The actual conformations of the semi-functionalized germanenes, however, could be more complex than the fully functionalized case, which are associated with the reaction paths during chemical processing<sup>3</sup>.

## References

- 1 O. Leenaerts, H. Peelaers, A. D. Hernandez-Nieves, B. Partoens and F. M. Peeters, *Phys. Rev. B*, 2010, **82**, 195436.
- 2 R.-W. Zhang, C.-W. Zhang, W.-X. Ji, S.-S. Li, S.-J. Hu, S.-S. Yan, P. Li, P.-J. Wang and F. Li, *New J. Phys.*, 2015, **17**, 083036.
- 3 D. Heidrich, *The Reaction Path in Chemistry: Current Approaches and Perspectives*, Springer, Netherlands, 1st edn, 1995.

<sup>a</sup> School of Chemistry and Chemical Engineering, Collaborative Innovation Center of Advanced Microstructures, Nanjing University, Nanjing 210093, China.

<sup>b</sup> School of Physics, National Laboratory of Solid State Microstructures, Nanjing University, Nanjing 210093, China.

<sup>c</sup> School of Physics and Optoelectronic Engineering, Yangtze University, Jingzhou 434023, Hubei, China.

<sup>†</sup> Electronic Supplementary Information (ESI) available: [details of any supplementary information available should be included here]. See DOI: 10.1039/b000000x/

<sup>‡</sup> Corresponding author. E-mail address: zenghui@yangtzeu.edu.cn

\* For the methyl functionalization, the chemical potential is obtained by calculating the  $\text{CH}_3$  molecule, similar to the previous study of  $\text{C}_2\text{H}$  molecule<sup>2</sup>.
